# Supplementary material for: Understanding the spin-dependent electronic properties of symmetrically far-edge doped zigzag graphene nanoribbon from a first principles study
Source: Royal Society of Chemistry journal article supplement (doi:10.1039/c7ra09889h), 2017-01-01
Supplement: c7ra09889h1.pdf [file c7ra09889h1.pdf]

## Electronic Supplementary Material

# Understanding the Spin-Dependent Electronic Properties of Symmetrically Far-Edge Doped Zigzag Graphene Nanoribbon from First Principle Study

Amrit Sarmah,<sup>a</sup> Pavel Hobza<sup>a,b</sup>

<sup>a</sup>Institute of Organic Chemistry and Biochemistry of the Czech Academy of Sciences, Flemingovo nám. 2, CZ-16610 Prague 6, Czech Republic

<sup>b</sup>Department of Physical Chemistry, Palacky University, CZ-77146 Olomouc, Czech Republic

### Table of contents

- S1 Pictorial representations of relaxed structures of undoped and doped graphene nanoribbons
- S2 DOS and PDOS plots for undoped 8 and 16 graphene nanoribbons
- S3 Highest occupied and lowest unoccupied states of N-doped graphene nanoribbons

Address correspondence to Amrit Sarmah, [amrit.sarmah@marge.uochb.cas.cz](mailto:amrit.sarmah@marge.uochb.cas.cz)

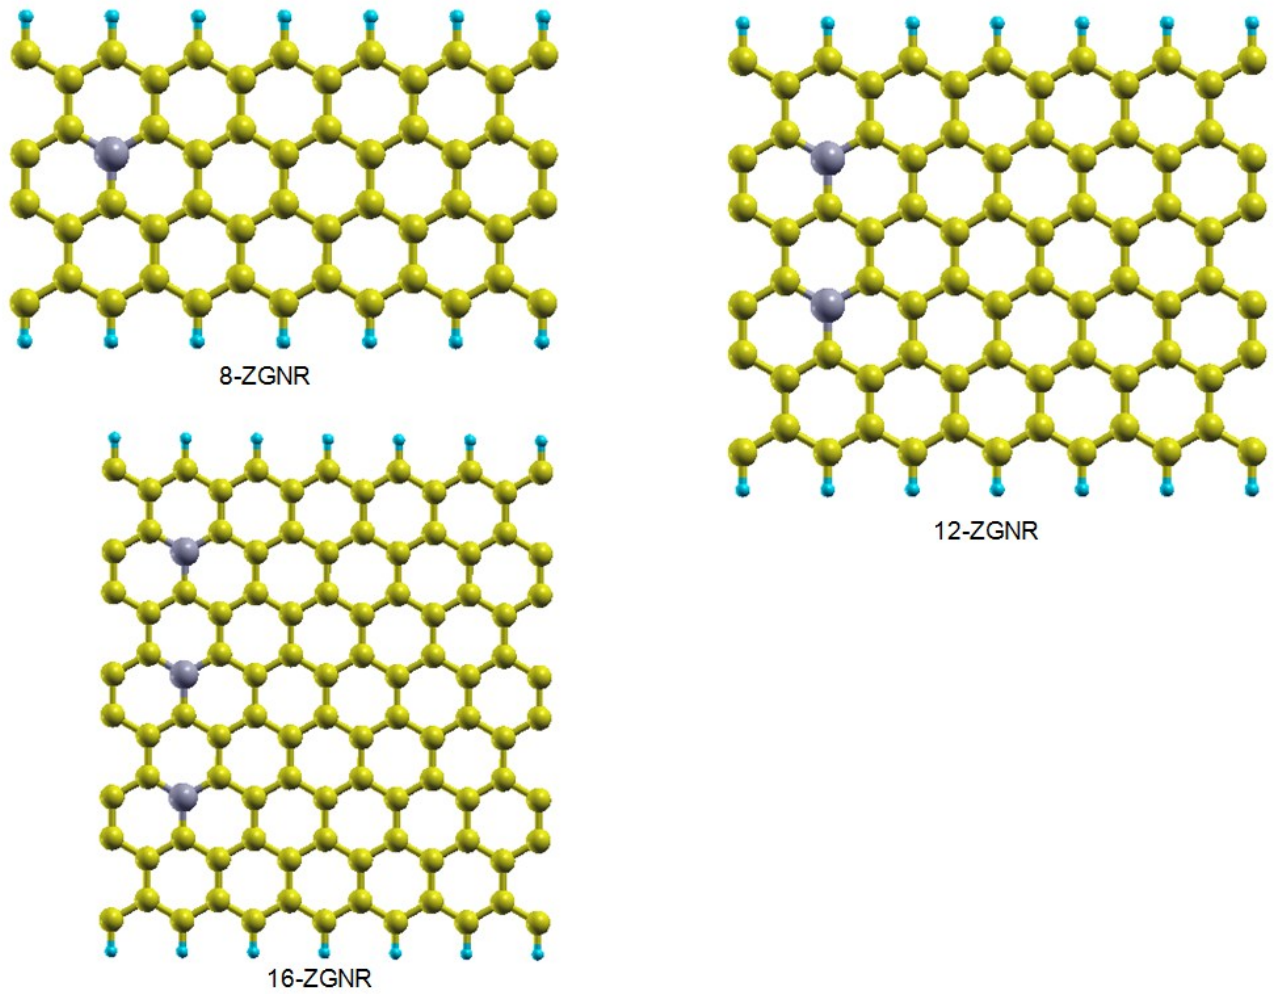

Figure S1: The pictorial representations of the three different zigzag nanoribbon systems considered for our study. Here, the purple colored sites depict the location of doping sites for external impurities i.e., nitrogen and boron.

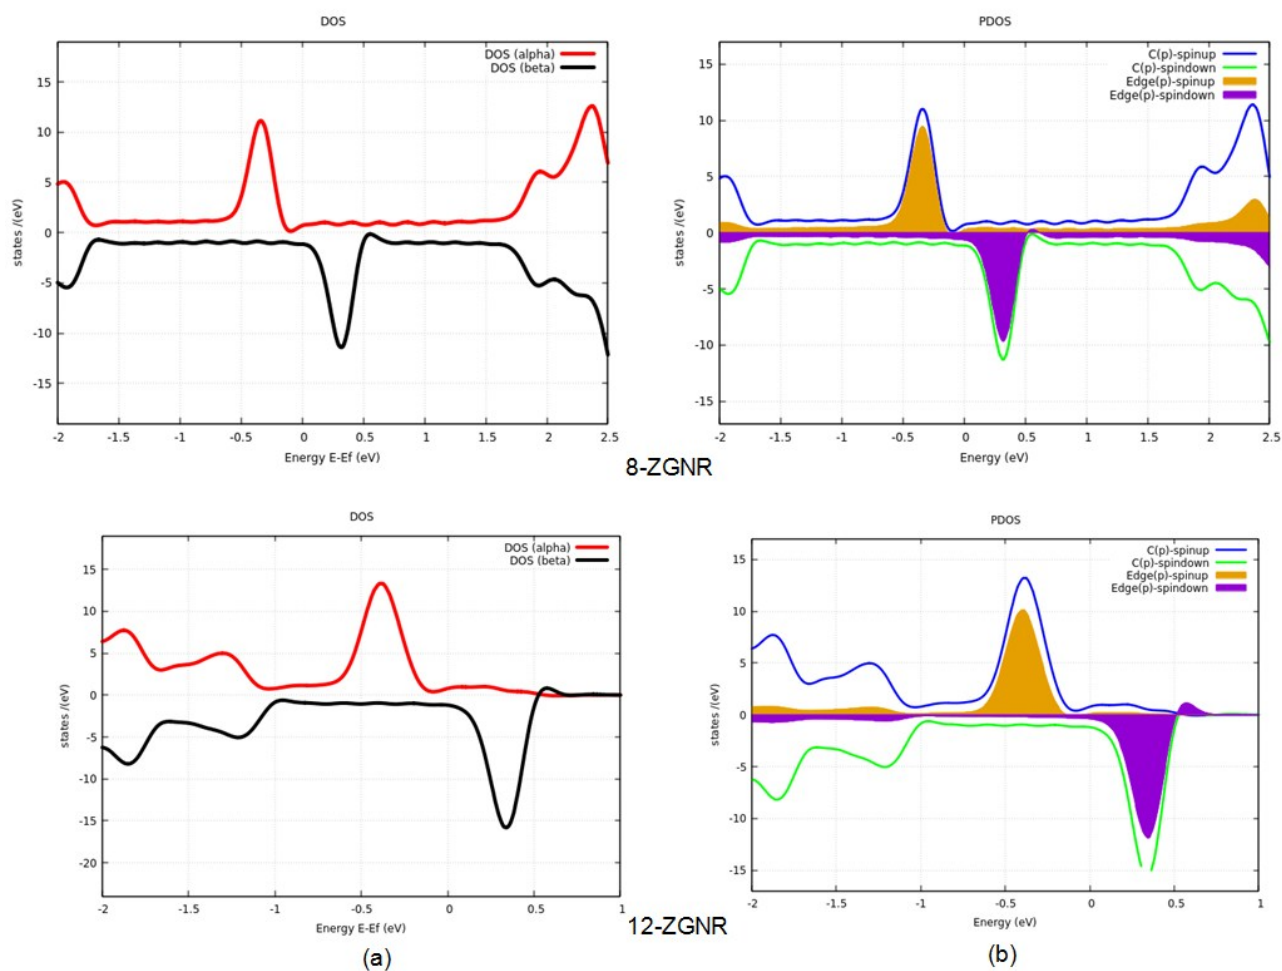

Figure S2: Density of states (DOS) (a, left panel) and projected density of states (PDOS) (b, left panel) for undoped 8 and 16-ZGNR systems.

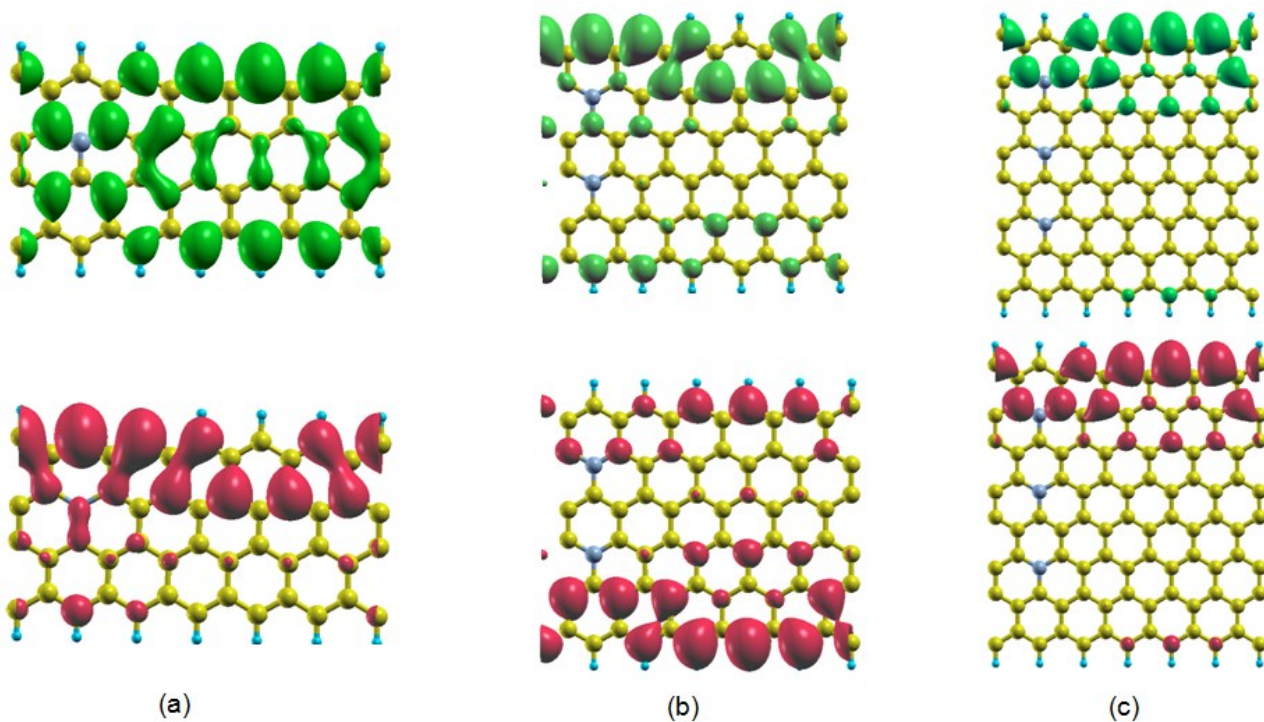

(a)

(b)

(c)

Figure S3: The highest occupied states (lower panel) and lowest unoccupied states (upper panel) for N-doped (a) 8 (b) 12 and (c) 16-ZGNR systems.
